# Supplementary material
Source: Springer Nature journal article supplement (https://www.springermedizin.de/resource/supplementary/12885_2014_4469_MOESM5_ESM.pdf/9466486)
Supplement: MOESM5 [file 9466486]

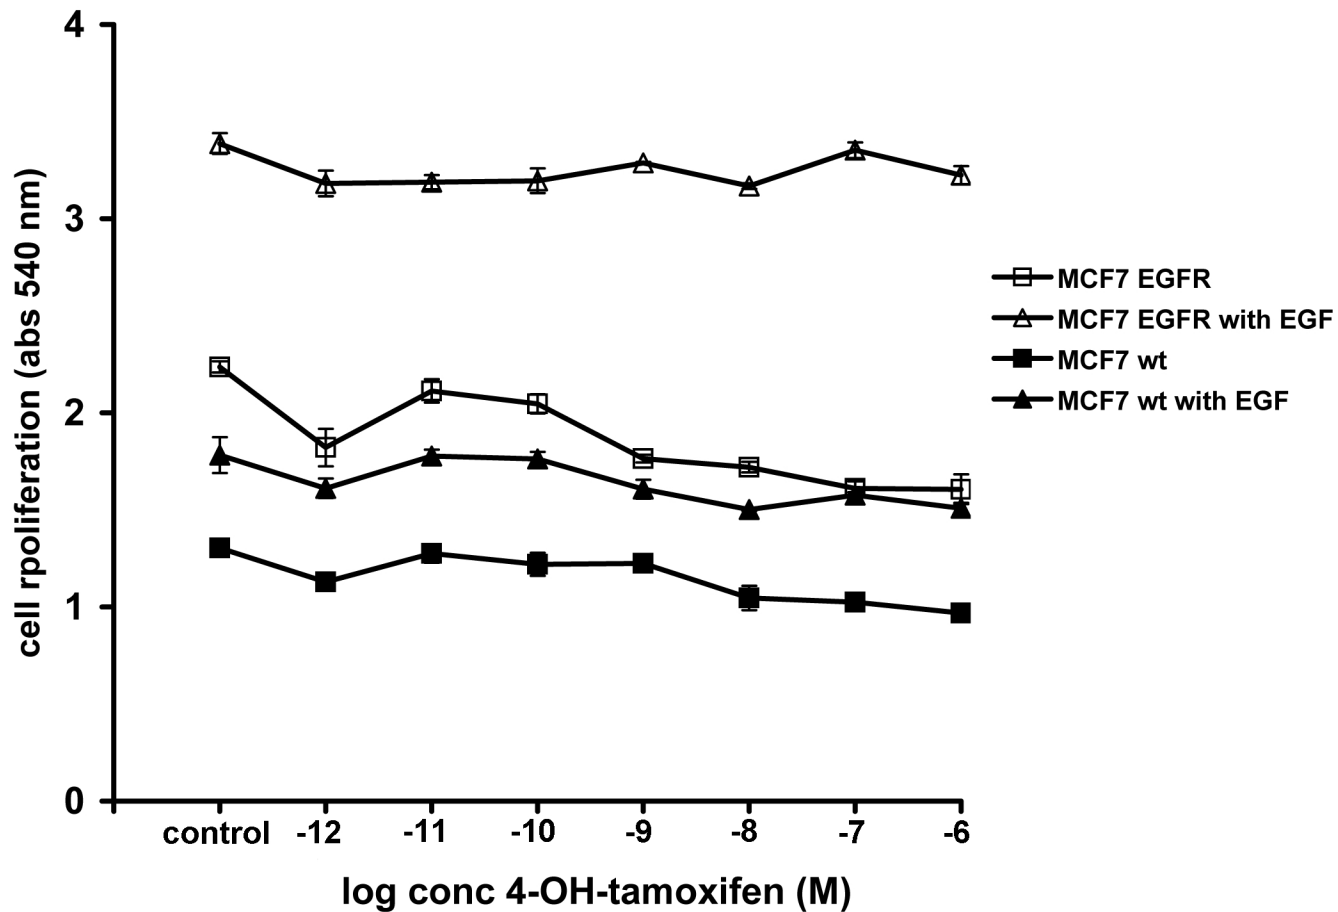

Supplementary Figure S5 (Moerkens et al.)
